# Supplementary material for: Pearl Millet Starch: A Natural Excipient With Potential for Industrial Pharmaceutical Use
Source: Research Square preprint supplement (doi:10.21203/rs.3.rs-8417880/v1), 2026-01-27
Supplement: Supplementary file 1 [file a95584fdd7ea109c88b749be.docx]

**Declaration of Interests:**

- The authors declare that they have no known competing financial interests or personal relationships that could have appeared to influence the work reported in this paper.
- The authors declare the following financial interests/personal relationships, which may be considered as potential competing interests:

**Acknowledgements:** The authors are thankful to RIMT University for providing the facilities and necessary requirements to carry out this research work, as well as the FTIR analysis conducted at CGC Landran, and the UV spectroscopy at RIMT University. We also thank all the authors for allowing us to share their details, and thank SVGOI, Swami Vivekanand College of Pharmacy, Banur, Punjab.

**Authors' Contributions:** Gurvir Singh, Rajat Koundal, Sahil Singh, Hurmandeep Kaur, and Shubham Gargare the major contributors to the writing, literature, and drafting of the manuscript; Dr Nikita Khera is the major contributor in editing and drafting the manuscript. all authors read and approved the final manuscript.

**Conflict of Interest Statement:** The authors have declared that no competing interests exist.

**Statement of Ethics:** This study was limited to pre-formulation experiments; therefore, an ethics statement is not applicable.

**Funding Sources:** There are no funding sources for this report.

**Guarantor of the manuscript:** Dr Nikita Khera, the corresponding author.

**Availability of Data and Materials:** Data for this research were generated through the tests for identification and characterization as detailed in the manuscript. The pearl millet for starch extraction was procured from the local markets of Punjab. All chemicals and laboratory equipment were purchased from the RIMT University laboratories, where UV spectroscopic analysis was also performed. IR spectroscopic analysis was done at CGC Landran. All the data sets are there in the paper which is supporting the results of this study, and no other external data have been used. Any other details can be obtained from the corresponding author on a reasonable ​‍​‌‍​‍‌​‍​‌‍​‍‌request.
